# Supplementary material
Source: MDPI journal article supplement (https://www.mdpi.com/2073-4433/15/5/611)
Supplement: s1 [file s1]

Radon levels by municipality in Latvia (Bq/m<sup>3</sup>)

| Nr. | Municipality              | n   | Mean   | SD     | Median | Q1  | Q3  | min | max |
|-----|---------------------------|-----|--------|--------|--------|-----|-----|-----|-----|
| 1   | Aglona Municipality       | 2   | 82.00  | 1.41   | 82     | 81  | -   | 81  | 83  |
| 2   | Aizkraukle Municipality   | 2   | 189.50 | 2.12   | 190    | 188 | -   | 188 | 191 |
| 3   | Aizpute Municipality      | 4   | 50.00  | 25.13  | 47     | 29  | 75  | 28  | 79  |
| 4   | Akniste Municipality      | 6   | 85.83  | 45.36  | 79     | 40  | 136 | 39  | 146 |
| 5   | Aloja Municipality        | 8   | 71.38  | 69.34  | 61     | 8   | 143 | 8   | 158 |
| 6   | Alsunga Municipality      | 2   | 76.00  | 8.49   | 76     | 70  | -   | 70  | 82  |
| 7   | Aluksne Municipality      | 32  | 60.13  | 56.71  | 38     | 25  | 82  | 13  | 238 |
| 8   | Amata Municipality        | 10  | 115.90 | 115.10 | 57     | 12  | 237 | 10  | 275 |
| 9   | Ape Municipality          | 8   | 96.63  | 52.37  | 92     | 47  | 148 | 46  | 181 |
| 10  | Auce Municipality         | 8   | 143.25 | 136.71 | 104    | 28  | 268 | 25  | 372 |
| 11  | Adazi Municipality        | 4   | 27.50  | 14.15  | 26     | 15  | 41  | 15  | 43  |
| 12  | Babite Municipality       | 4   | 51.25  | 50.22  | 48     | 8   | 98  | 8   | 101 |
| 13  | Baldone Municipality      | 7   | 46.71  | 25.77  | 57     | 13  | 63  | 9   | 77  |
| 14  | Baltinava Municipality    | N/A | N/A    | N/A    | N/A    | N/A | N/A | N/A | N/A |
| 15  | Balvi Municipality        | 8   | 40.38  | 10.46  | 43     | 30  | 49  | 26  | 56  |
| 16  | Bauska Municipality       | 18  | 48.83  | 24.34  | 44     | 32  | 65  | 17  | 96  |
| 17  | Beverina Municipality     | 4   | 96.25  | 54.09  | 91     | 49  | 149 | 48  | 156 |
| 18  | Broceni Municipality      | 4   | 113.75 | 121.71 | 99     | 10  | 232 | 10  | 247 |
| 19  | Burtnieki Municipality    | 10  | 47.40  | 36.08  | 34     | 26  | 65  | 15  | 118 |
| 20  | Carnikava Municipality    | 4   | 25.50  | 2.89   | 26     | 23  | 28  | 23  | 28  |
| 21  | Cesvaine Municipality     | 2   | 32.50  | 2.12   | 33     | 31  | -   | 31  | 34  |
| 22  | Cesis Municipality        | 2   | 34.00  | 1.41   | 34     | 33  | -   | 33  | 35  |
| 23  | Cibla Municipality        | 2   | 70.00  | 9.90   | 70     | 63  | -   | 63  | 77  |
| 24  | Dagda Municipality        | 18  | 51.44  | 42.88  | 37     | 25  | 67  | 10  | 173 |
| 25  | Daugavpils                | 4   | 150.25 | 119.04 | 147    | 45  | 259 | 43  | 264 |
| 26  | Daugavpils Municipality   | 22  | 85.55  | 74.58  | 64     | 31  | 112 | 10  | 327 |
| 27  | Dobele Municipality       | 18  | 77.89  | 27.92  | 88     | 60  | 96  | 18  | 115 |
| 28  | Dundaga Municipality      | 4   | 29.75  | 32.71  | 20     | 5   | 64  | 5   | 74  |
| 29  | Durbe Municipality        | 2   | 235.00 | 188.09 | 235    | 102 | -   | 102 | 368 |
| 30  | Engure Municipality       | 8   | 33.25  | 13.83  | 28     | 24  | 43  | 20  | 61  |
| 31  | Ergli Municipality        | 6   | 30.33  | 23.44  | 21     | 11  | 60  | 10  | 61  |
| 32  | Garkalne Municipality     | 8   | 30.75  | 7.19   | 33     | 28  | 35  | 15  | 39  |
| 33  | Grobina Municipality      | 6   | 93.83  | 80.61  | 50     | 42  | 175 | 32  | 230 |
| 34  | Gulbene Municipality      | 32  | 65.03  | 60.29  | 46     | 21  | 84  | 16  | 273 |
| 35  | Iecava Municipality       | 2   | 15.00  | 2.83   | 15     | 13  | -   | 13  | 17  |
| 36  | Ikskile Municipality      | 7   | 93.00  | 106.71 | 49     | 25  | 100 | 22  | 326 |
| 37  | Ilukste Municipality      | 10  | 70.50  | 30.09  | 84     | 43  | 95  | 19  | 100 |
| 38  | Incukalns Municipality    | 2   | 40.50  | 0.71   | 41     | 40  | -   | 40  | 41  |
| 39  | Jaunjelgava Municipality  | 14  | 75.64  | 49.19  | 57     | 36  | 133 | 25  | 164 |
| 40  | Jaunpiebalga Municipality | 2   | 29.50  | 0.71   | 30     | 29  | -   | 29  | 30  |
| 41  | Jaunpils Municipality     | 2   | 23.00  | 0.00   | 23     | 23  | 23  | 23  | 23  |
| 42  | Jelgava                   | 4   | 45.00  | 46.67  | 29     | 12  | 95  | 12  | 111 |

**Radon levels by municipality in Latvia (Bq/m<sup>3</sup>)**

| <b>Nr.</b> | <b>Municipality</b>    | <b>n</b> | <b>Mean</b> | <b>SD</b> | <b>Median</b> | <b>Q1</b> | <b>Q3</b> | <b>min</b> | <b>max</b> |
|------------|------------------------|----------|-------------|-----------|---------------|-----------|-----------|------------|------------|
| 43         | Jelgava Municipality   | 24       | 64.13       | 72.32     | 33            | 21        | 67        | 2          | 287        |
| 44         | Jekabpils              | 4        | 141.00      | 38.84     | 141           | 105       | 178       | 94         | 189        |
| 45         | Jekabpils Municipality | 8        | 93.75       | 71.27     | 84            | 27        | 167       | 19         | 191        |
| 46         | Jurmala                | 6        | 31.33       | 15.31     | 28            | 17        | 50        | 16         | 50         |
| 47         | Kandava Municipality   | 4        | 94.00       | 56.78     | 83            | 46        | 153       | 42         | 168        |
| 48         | Karsava Municipality   | 6        | 68.83       | 46.12     | 78            | 14        | 112       | 13         | 121        |
| 49         | Koceni Municipality    | 4        | 27.00       | 1.83      | 27            | 25        | 29        | 25         | 29         |
| 50         | Koknese Municipality   | 10       | 107.80      | 93.38     | 82            | 44        | 143       | 18         | 323        |
| 51         | Krimulda Municipality  | 5        | 33.00       | 24.67     | 22            | 21        | 51        | 20         | 77         |
| 52         | Kraslava Municipality  | 4        | 34.75       | 32.96     | 29            | 7         | 68        | 7          | 74         |
| 53         | Krustpils Municipality | 4        | 92.50       | 5.07      | 92            | 88        | 98        | 88         | 99         |
| 54         | Kuldiga Municipality   | 14       | 85.79       | 30.76     | 83            | 56        | 115       | 49         | 145        |
| 55         | Kegums Municipality    | 8        | 75.88       | 43.83     | 94            | 28        | 102       | 5          | 123        |
| 56         | Kekava Municipality    | 16       | 46.19       | 29.27     | 50            | 21        | 59        | 5          | 104        |
| 57         | Lielvarde Municipality | 8        | 64.50       | 46.61     | 59            | 23        | 96        | 17         | 146        |
| 58         | Liepaja                | 4        | 22.25       | 6.70      | 24            | 16        | 28        | 13         | 29         |
| 59         | Ligatne Municipality   | 2        | 29.50       | 3.54      | 30            | 27        | -         | 27         | 32         |
| 60         | Limbazi Municipality   | 13       | 50.38       | 34.48     | 56            | 18        | 79        | 8          | 107        |
| 61         | Livani Municipality    | 12       | 61.58       | 13.96     | 56            | 51        | 71        | 41         | 86         |
| 62         | Lubana Municipality    | 4        | 64.25       | 3.78      | 64            | 61        | 68        | 61         | 68         |
| 63         | Ludza Municipality     | 10       | 80.50       | 20.13     | 79            | 65        | 98        | 49         | 110        |
| 64         | Madona Municipality    | 34       | 80.35       | 54.02     | 63            | 33        | 124       | 14         | 224        |
| 65         | Malpils Municipality   | N/A      | N/A         | N/A       | N/A           | N/A       | N/A       | N/A        | N/A        |
| 66         | Marupe Municipality    | 6        | 38.17       | 17.59     | 47            | 17        | 52        | 15         | 52         |
| 67         | Mazsalaca Municipality | 4        | 50.25       | 19.00     | 48            | 34        | 70        | 31         | 75         |
| 68         | Mersrags Municipality  | 2        | 7.50        | 3.54      | 8             | 5         | -         | 5          | 10         |
| 69         | Nauksenu Municipality  | 2        | 137.50      | 4.95      | 138           | 134       | -         | 134        | 141        |
| 70         | Nereta Municipality    | 8        | 58.38       | 28.75     | 58            | 29        | 80        | 27         | 107        |
| 71         | Nica Municipality      | 4        | 65.00       | 40.80     | 51            | 36        | 108       | 35         | 123        |
| 72         | Ogre Municipality      | 16       | 69.88       | 42.39     | 55            | 33        | 113       | 12         | 139        |
| 73         | Olaine Municipality    | 4        | 40.75       | 26.53     | 39            | 18        | 66        | 18         | 68         |
| 74         | Ozolnieki Municipality | 6        | 31.83       | 8.11      | 31            | 25        | 37        | 25         | 47         |
| 75         | Pargauja Municipality  | 6        | 84.67       | 47.25     | 70            | 45        | 139       | 40         | 144        |
| 76         | Pavilosta Municipality | 3        | 33.33       | 10.02     | 37            | 22        | -         | 22         | 41         |
| 77         | Plavinas Municipality  | 8        | 113.25      | 98.49     | 86            | 30        | 213       | 23         | 274        |
| 78         | Preili Municipality    | 6        | 97.83       | 66.13     | 99            | 32        | 154       | 15         | 196        |
| 79         | Priekule Municipality  | 3        | 43.33       | 3.51      | 43            | 40        | -         | 40         | 47         |
| 80         | Priekuli Municipality  | 6        | 102.33      | 103.54    | 69            | 45        | 144       | 28         | 309        |
| 81         | Rauna Municipality     | 4        | 188.25      | 42.08     | 184           | 152       | 229       | 152        | 234        |
| 82         | Rezekne                | 4        | 225.00      | 24.75     | 232           | 199       | 245       | 192        | 245        |
| 83         | Rezekne Municipality   | 19       | 80.32       | 48.61     | 85            | 40        | 119       | 10         | 170        |
| 84         | Riebiņi Municipality   | 4        | 49.50       | 22.35     | 55            | 26        | 68        | 19         | 69         |
| 85         | Rīga                   | 21       | 40.19       | 34.90     | 32            | 19        | 50        | 8          | 158        |

Table S1

**Radon levels by municipality in Latvia (Bq/m<sup>3</sup>)**

| <b>Nr.</b> | <b>Municipality</b>      | <b>n</b> | <b>Mean</b> | <b>SD</b> | <b>Median</b> | <b>Q1</b> | <b>Q3</b> | <b>min</b> | <b>max</b> |
|------------|--------------------------|----------|-------------|-----------|---------------|-----------|-----------|------------|------------|
| 86         | Roja Municipality        | 2        | 41.50       | 0.71      | 42            | 41        | -         | 41         | 42         |
| 87         | Ropazi Municipality      | 4        | 86.75       | 27.84     | 83            | 63        | 115       | 63         | 119        |
| 88         | Rucava Municipality      | N/A      | N/A         | N/A       | N/A           | N/A       | N/A       | N/A        | N/A        |
| 89         | Rugaji Municipality      | 4        | 88.25       | 68.62     | 75            | 31        | 159       | 30         | 173        |
| 90         | Rundale Municipality     | 6        | 79.17       | 80.38     | 39            | 27        | 144       | 26         | 228        |
| 91         | Rujiena Municipality     | 10       | 85.60       | 50.37     | 86            | 25        | 127       | 23         | 163        |
| 92         | Salacgriva Municipality  | 4        | 49.50       | 34.57     | 45            | 20        | 84        | 20         | 89         |
| 93         | Sala Municipality        | 4        | 97.00       | 48.55     | 86            | 57        | 148       | 55         | 161        |
| 94         | Salaspils Municipality   | 8        | 69.25       | 50.97     | 49            | 36        | 117       | 26         | 163        |
| 95         | Saldus Municipality      | 22       | 76.09       | 78.27     | 55            | 39        | 95        | 1          | 384        |
| 96         | Saulkrasti Municipality  | 3        | 13.00       | 3.00      | 13            | 10        | -         | 10         | 16         |
| 97         | Seja Municipality        | 2        | 92.00       | 28.28     | 92            | 72        | -         | 72         | 112        |
| 98         | Sigulda Municipality     | 5        | 49.00       | 35.93     | 36            | 25        | 80        | 14         | 109        |
| 99         | Skriveri Municipality    | 2        | 35.00       | 5.66      | 35            | 31        | -         | 31         | 39         |
| 100        | Skrunda Municipality     | 8        | 84.50       | 31.69     | 92            | 52        | 97        | 47         | 143        |
| 101        | Smiltene Municipality    | 18       | 44.28       | 36.28     | 28            | 16        | 82        | 6          | 110        |
| 102        | Stopini Municipality     | 2        | 28.50       | 16.26     | 29            | 17        | -         | 17         | 40         |
| 103        | Strenci Municipality     | 4        | 59.25       | 3.86      | 60            | 55        | 63        | 54         | 63         |
| 104        | Talsi Municipality       | 33       | 79.21       | 55.66     | 65            | 39        | 96        | 14         | 238        |
| 105        | Tervete Municipality     | 6        | 68.83       | 62.92     | 37            | 24        | 133       | 22         | 173        |
| 106        | Tukums Municipality      | 12       | 60.83       | 40.05     | 44            | 30        | 104       | 16         | 127        |
| 107        | Vainode Municipality     | 2        | 88.50       | 3.54      | 89            | 86        | -         | 86         | 91         |
| 108        | Valka Municipality       | 8        | 54.13       | 58.65     | 26            | 16        | 116       | 11         | 154        |
| 109        | Valmiera                 | 2        | 47.00       | 1.41      | 47            | 46        | -         | 46         | 48         |
| 110        | Varaklani Municipality   | 6        | 206.83      | 101.32    | 167           | 122       | 318       | 120        | 362        |
| 111        | Varkava Municipality     | 4        | 89.50       | 30.80     | 90            | 62        | 118       | 60         | 119        |
| 112        | Vecpiebalga Municipality | 6        | 53.67       | 37.66     | 52            | 18        | 88        | 18         | 97         |
| 113        | Vecumnieki Municipality  | 12       | 58.25       | 32.49     | 57            | 27        | 79        | 20         | 115        |
| 114        | Ventspils                | 4        | 54.50       | 47.34     | 33            | 27        | 104       | 27         | 125        |
| 115        | Ventspils Municipality   | 15       | 49.80       | 34.08     | 35            | 28        | 80        | 14         | 136        |
| 116        | Viesīte Municipality     | 6        | 67.83       | 23.71     | 63            | 46        | 91        | 44         | 105        |
| 117        | Vilaka Municipality      | 4        | 69.00       | 6.22      | 69            | 63        | 75        | 62         | 76         |
| 118        | Vilani Municipality      | 2        | 69.00       | 9.90      | 69            | 62        | -         | 62         | 76         |
| 119        | Zilupe Municipality      | N/A      | N/A         | N/A       | N/A           | N/A       | N/A       | N/A        | N/A        |

n- number of measurements

N/A – data not available
